# Supplementary material for: Invasive Lobular Carcinoma Cell Lines Are Characterized by Unique Estrogen-Mediated Gene Expression Patterns and Altered Tamoxifen Response
Source: Oxford University Press journal article supplement (doi:10.1158/0008-5472.can-13-2779), 2014-01-15
Supplement: 00085472can132779-sup-tab2.xlsx [file 00085472can132779-sup-tab2.xlsx]

## Sheet: Sheet1
Values shown are fold change versus control, '1' indicates non-significant difference at that condition
Top third of ILC-specific induced	Gene Name	MM134 early	MM134 Late	SUM44 Early	SUM44 Late
UXS1	UDP-glucuronate decarboxylase 1	1	1.5873	1	1.27583
TTC39A	tetratricopeptide repeat domain 39A	1	1.29851	1.20736	1.60557
CDKN1C	cyclin-dependent kinase inhibitor 1C (p57, Kip2)	1.3599	1.73661	1	1.16896
KIF16B	kinesin family member 16B	1.20016	1	1.71381	1.26084
LEPR	leptin receptor	1	1.30717	1.19099	1.62081
NT5DC3	5'-nucleotidase domain containing 3	1.21134	1.57006	1.26831	1.38772
TOB1	transducer of ERBB2, 1	1.18943	1	1.77509	1.40062
SGCB	sarcoglycan, beta (43kDa dystrophin-associated glycoprotein)	1	1.23488	1.27187	1.74858
EML1	echinoderm microtubule associated protein like 1	1.17323	1.54984	1.4888	1.46799
ZIC3	Zic family member 3 (odd-paired homolog, Drosophila)	1.33323	1.64744	1.27963	1.47545
FASN	fatty acid synthase	1	1.26944	1.87272	1.51461
PELI1	pellino homolog 1 (Drosophila)	1.2768	1.44844	1.75071	1.47125
CAMTA1	calmodulin binding transcription activator 1	1.17906	1.35546	1	1.88068
MICALL1	MICAL-like 1	1	1.32993	1.94278	1.19996
DSCR3	Down syndrome critical region gene 3	1.36914	1.29714	1.98766	1.26259
RBL1	retinoblastoma-like 1 (p107)	1	1.54842	1	1.82932
ARMCX2	armadillo repeat containing, X-linked 2	1.47358	1	1.96481	1.42042
MAP3K8	mitogen-activated protein kinase kinase kinase 8	1.87046	1.56015	1.66703	1.47805
PTPN1	protein tyrosine phosphatase, non-receptor type 1	1.40065	1.36984	2.21427	1.50879
ZFP36	zinc finger protein 36, C3H type, homolog (mouse)	1.20349	1.20988	2.44617	1.50004
WDR76	WD repeat domain 76	1	1.72582	1.19839	2.00838
MSN	moesin	1	2.02123	1.24383	1.87063
SNAI1	snail homolog 1 (Drosophila)	1.57146	1.41377	2.38903	1.16284
ZNF814	zinc finger protein 814	1.86142	1.62694	2.15875	1.44821
KCND3	potassium voltage-gated channel, Shal-related subfamily, member 3	1.30135	1.42726	2.53123	3.36737
ARHGEF26	Src homology 3 domain-containing guanine nucleotide exchange factor	1.89745	1.36222	2.95315	1.81247
TFCP2L1	transcription factor CP2-like 1	2.25291	3.7618	1.58459	1.80891
CCDC88A	coiled-coil domain containing 88A	1	2.10862	1	3.62914
WNT4	wingless-type MMTV integration site family, member 4	2.10141	2.89971	3.1396	2.16899
DOCK10	dedicator of cytokinesis 10	1	1.74675	1	6.33855
Top third of ILC-specific repressed	Gene Name	MM134 early	MM134 Late	SUM44 Early	SUM44 Late
RAPGEF4	Rap guanine nucleotide exchange factor (GEF) 4	1	0.217026	1	0.0996793
PDE4B	phosphodiesterase 4B, cAMP-specific (phosphodiesterase E4 dunce homolog, Drosophila)	0.451646	0.259774	0.21627	0.666749
STK32B	serine/threonine kinase 32B	1	0.517605	1	0.235041
NAV3	neuron navigator 3; similar to neuron navigator 3	1	0.588189	0.200559	0.379204
HLF	hepatic leukemia factor	0.869401	0.405181	0.498692	0.570306
NLRP1	NLR family, pyrin domain containing 1	0.872787	0.514783	0.729817	0.395426
SNAP25	synaptosomal-associated protein, 25kDa	1	0.555057	1	0.375166
GNAI1	guanine nucleotide binding protein (G protein), alpha inhibiting activity polypeptide 1	0.630638	1	0.304638	0.730367
RORA	RAR-related orphan receptor A	1	0.465517	1	0.471216
CXXC4	CXXC finger 4	0.69446	0.427499	0.663954	0.510233
SCGB1D2	secretoglobin, family 1D, member 2	1	0.353233	1	0.593127
CHN2	chimerin (chimaerin) 2	1	0.602733	0.391289	0.376084
DACH1	dachshund homolog 1 (Drosophila)	1	0.595822	0.751596	0.408827
SYNE1	spectrin repeat containing, nuclear envelope 1	1	0.557093	1	0.467323
SPARC	secreted protein, acidic, cysteine-rich (osteonectin)	1	0.566612	1	0.464051
SMAGP	small trans-membrane and glycosylated protein	1	0.647722	0.749014	0.405617
GALNT14	UDP-N-acetyl-alpha-D-galactosamine:polypeptide N-acetylgalactosaminyltransferase 14 (GalNAc-T14)	0.929884	0.557908	1	0.508411
RNF128	ring finger protein 128	1	0.666775	1	0.405004
F3	coagulation factor III (thromboplastin, tissue factor)	0.726883	0.608744	0.499604	0.663611
RNASE4	ribonuclease, RNase A family, 4	1	0.460155	1	0.648268
OVGP1	oviductal glycoprotein 1, 120kDa	1	0.426429	0.782524	0.688135
HGD	homogentisate 1,2-dioxygenase (homogentisate oxidase)	1	0.608345	1	0.511538
LPAR6	purinergic receptor P2Y, G-protein coupled, 5	0.834475	0.754902	0.371191	0.516581
ENOX1	ecto-NOX disulfide-thiol exchanger 1	1	0.529833	1	0.608893
QDPR	quinoid dihydropteridine reductase	1	0.583383	1	0.603511
SIX2	SIX homeobox 2	1	0.505011	0.7617	0.69362
ZNF277	zinc finger protein 277	1	0.582318	1	0.64842
ATP1A1	ATPase, Na+/K+ transporting, alpha 1 polypeptide	0.928906	0.547728	0.969478	0.692986
PLXNC1	plexin C1	1	0.715186	1	0.54005
EAF2	ELL associated factor 2	0.849924	0.628448	0.751719	0.632734
DPYD	dihydropyrimidine dehydrogenase	1	0.560642	1	0.702692
HEY1	hairy/enhancer-of-split related with YRPW motif 1	0.773649	0.699866	0.570718	0.84334
NR3C2	nuclear receptor subfamily 3, group C, member 2	0.844372	0.880498	0.446021	1
F7	coagulation factor VII (serum prothrombin conversion accelerator)	1	0.773839	1	0.519473
CCT6B	chaperonin containing TCP1, subunit 6B (zeta 2)	1	0.643449	1	0.650528
GLI3	GLI family zinc finger 3	0.632114	0.628619	0.695071	0.680916
FAH	fumarylacetoacetate hydrolase (fumarylacetoacetase)	1	0.676816	1	0.637331
ANG	angiogenin, ribonuclease, RNase A family, 5	1	0.542905	1	0.772851
TCEAL1	transcription elongation factor A (SII)-like 1	0.867291	0.566434	1	0.753607
ABLIM1	actin binding LIM protein 1	1	0.617979	1	0.731509
BACH1	BTB and CNC homology 1, basic leucine zipper transcription factor 1	0.809868	0.698249	0.787406	0.660237
ALS2CR8	amyotrophic lateral sclerosis 2 (juvenile) chromosome region, candidate 8	1	0.670866	1	0.689467
CRTC3	CREB regulated transcription coactivator 3	0.823788	0.612287	0.779464	0.777089
NPAS2	neuronal PAS domain protein 2	1	0.75733	0.637902	0.792927
RAB15	RAB15, member RAS onocogene family	1	0.742954	1	0.658067
CBX7	chromobox homolog 7	0.895768	0.765306	0.640891	0.722565
SLC44A4	solute carrier family 44, member 4	1	0.74341	1	0.67322
Ad hoc, from ILC-specific genes	Gene Name	MM134 early	MM134 Late	SUM44 Early	SUM44 Late
FGFR1	fibroblast growth factor receptor 1	1.05605	0.746884	0.808097	0.734801
TGFBR3	transforming growth factor, beta receptor III	0.713072	0.676498	1.5494	2.24551
NR4A2	nuclear receptor subfamily 4, group A, member 2	1.70346	2.08444	0.551805	1
CDK14	PFTAIRE protein kinase 1	1	0.844148	1	2.8608
DUSP14	dual specificity phosphatase 14	0.897387	1.10863	0.563893	0.824891
LHX2	LIM homeobox 2	0.842828	1.60819	0.551734	1.23538
PTPN3	protein tyrosine phosphatase, non-receptor type 3	1	1.22695	0.787521	0.906938
PTPRN2	protein tyrosine phosphatase, receptor type, N polypeptide 2	1	0.794748	1.11108	0.760788
ACVR1B	activin A receptor, type IB	0.853444	0.702298	0.85718	0.756739
PIAS1	protein inhibitor of activated STAT, 1	0.832914	0.733613	0.846243	0.738647
ARNTL	aryl hydrocarbon receptor nuclear translocator-like	0.888443	0.699386	0.782023	0.786052
ACVR2A	activin A receptor, type IIA	0.82507	0.829176	0.747021	0.854191
HDAC1	histone deacetylase 1	1	0.858446	1	0.858021
SEPT6	septin 6	1	0.835042	1	0.693356
PTPN4	protein tyrosine phosphatase, non-receptor type 4 (megakaryocyte)	1	0.790026	1	0.721101
NRAS	neuroblastoma RAS viral (v-ras) oncogene homolog	1	1.44098	1	1.21376
FOXO1	forkhead box O1	1	0.583057	1	0.861285
PTEN	phosphatase and tensin homolog	1	0.85226	0.934438	0.879605
GRB2	growth factor receptor-bound protein 2	1	0.730664	1	0.828399
KLF9	Kruppel-like factor 9	1	0.441897	1	0.761061
EPCAM	epithelial cell adhesion molecule	1	0.919545	1	0.886885
PIK3CA	phosphatidylinositol-4,5-bisphosphate 3-kinase, catalytic subunit alpha	1	0.91335	1	0.831157
Common All	Name	MCF-7 early	T47D Late	BT474 Early	BT474 Late	MM134 Early	MM134 Late	SUM44 Early	SUM44 Late
MYC	v-myc myelocytomatosis viral oncogene homolog (avian)	2.46058	9.64646	26.1729	37.2715	3.27255	2.08142	5.07053	2.03122
SGK3	serum/glucocorticoid regulated kinase 3	2.83039	1	5.06303	4.40762	2.13799	3.43412	1.53488	3.43435
MYBL1	v-myb myeloblastosis viral oncogene homolog (avian)-like 1	4.37414	3.43426	2.36199	4.56305	2.22634	2.73887	2.12752	2.26343
IGFBP4	insulin-like growth factor binding protein 4	2.48285	4.08405	1.46917	3.73213	2.44884	2.84637	2.87998	3.40401
IL17RB	interleukin 17 receptor B	2.03637	2.53151	1	1.75078	1.44668	2.74895	3.50833	3.24803
GREB1	growth regulation by estrogen in breast cancer 1	6.50703	6.86852	4.62675	10.4831	2.22206	2.93874	3.91331	5.30668
CCNG2	cyclin G2	0.390935	0.469761	0.698823	0.435275	0.580961	0.50279	0.522997	0.608965
ENC1	ectodermal-neural cortex 1 (with BTB-like domain)	0.496202	0.529242	0.320856	0.524858	0.727397	0.655597	0.313617	0.67335
Housekeeping genes
RPLP0
TTI2
POLR2C
